# Supplementary material for: Assessment of solar photocatalytic degradation and mineralization of amoxicillin trihydrate (AMT) using slurry and fixed-bed batch reactor: efficacy of parabolic trough collector
Source: Royal Society of Chemistry journal article supplement (doi:10.1039/c6ra03414d), 2016-01-01

### MS Data Review All Plots - 3/17/2016 11:09 AM

File: c:\brukerws\data\jan16\3.xms

Sample: 3

Scan Range: 1 - 9470 Time Range: 1.00 - 34.00 min.

Operator: Rayees Ahmad

Date: 3/16/2016 2:12 PM

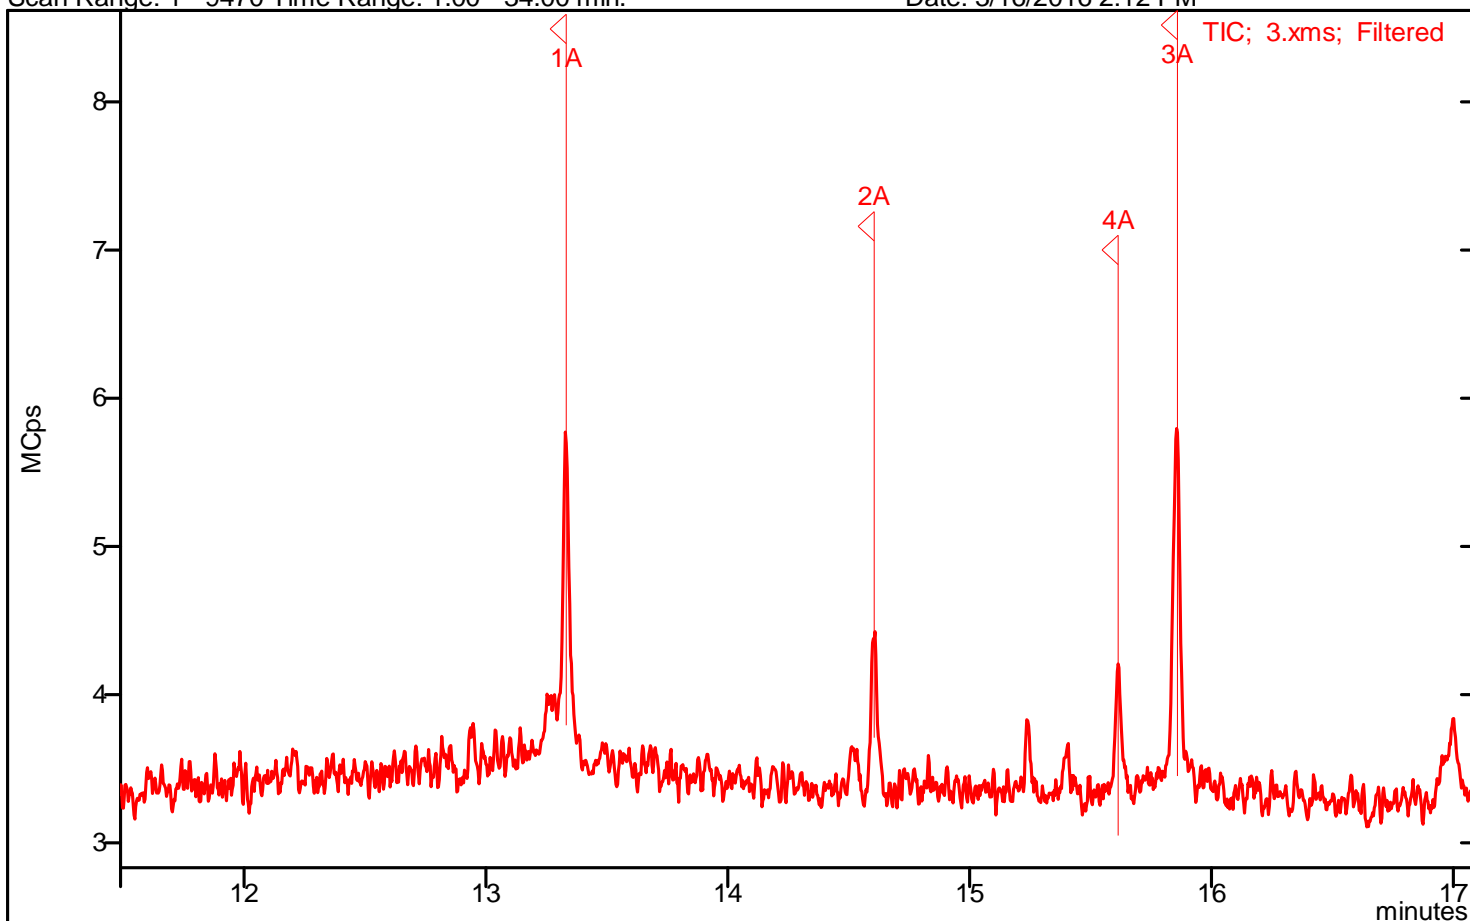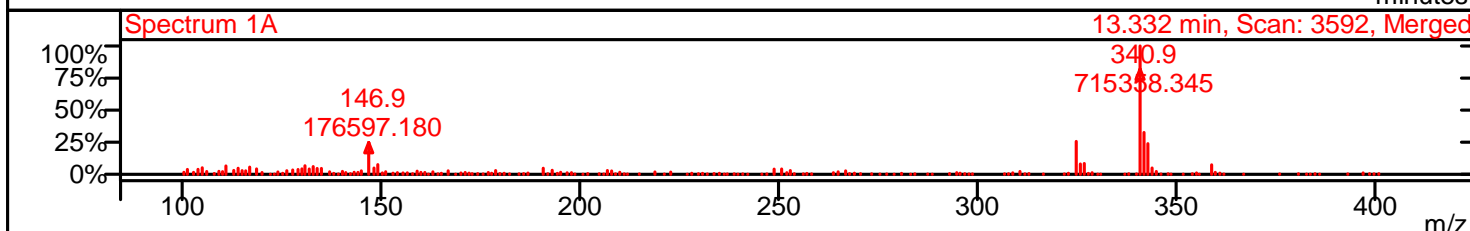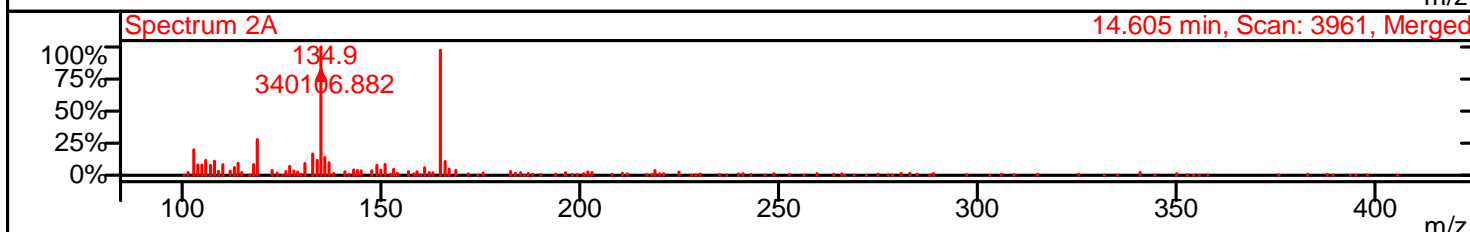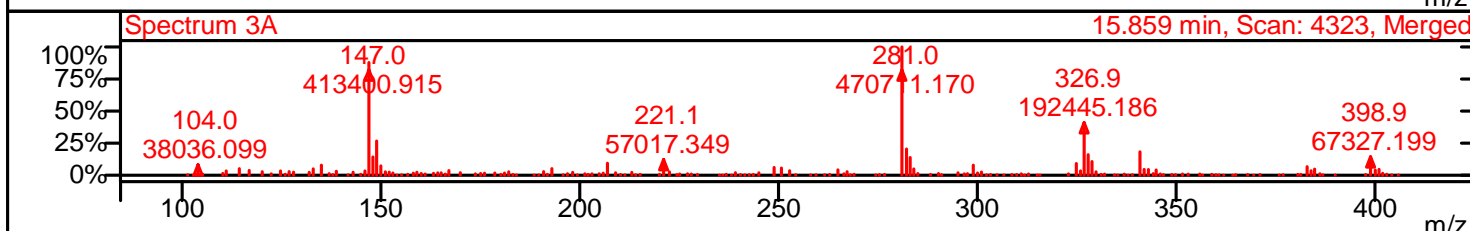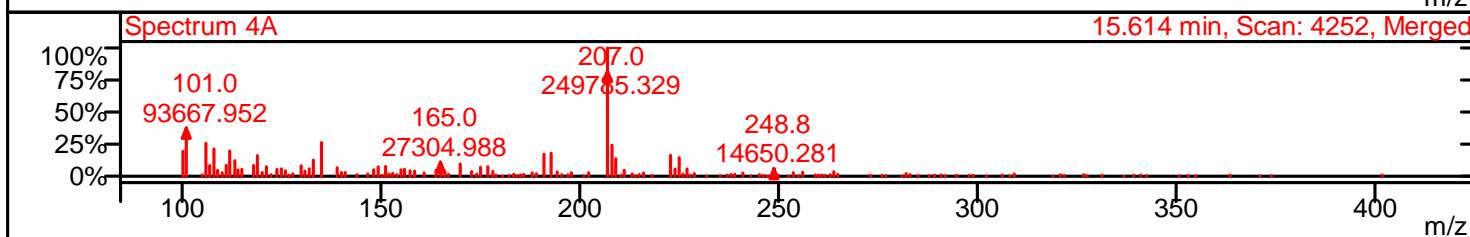

Supplement: c6ra03414d1.pdf [file c6ra03414d1.pdf]
